# Supplementary material
Source: PubMed Central journal article supplement (PMC6624170)

**SUPPLEMENTARY MATERIALS****COMT and alpha-tocopherol in cancer prevention: gene-supplement interactions in two randomized  
clinical trials**

Kathryn T. Hall, PhD, MPH, Julie E. Buring, ScD, Kenneth J. Mukamal, MD, MPH, M. Vinayaga Moorthy,  
PhD, Peter Wayne, PhD, Ted J. Kaptchuk, Elisabeth M. Battinelli, MD, PhD, Paul M Ridker, MD, Howard  
D. Sesso, ScD, Stephanie J. Weinstein, PhD, Demetrius Albanes, MD, MPH, Nancy R. Cook, ScD and

Daniel I. Chasman, PhD

**Supplementary Table 1. Baseline characteristics of WGHS participants in the trial and post-trial (participants who were alive and opted in for the observational period) by randomized alpha-tocopherol and placebo allocation.**

| Characteristic             | Trial Period                 |         |                     |         | Post-trial Period            |         |                     |         |
|----------------------------|------------------------------|---------|---------------------|---------|------------------------------|---------|---------------------|---------|
|                            | Alpha-tocopherol,<br>No. (%) |         | Placebo,<br>No. (%) |         | Alpha-tocopherol,<br>No. (%) |         | Placebo,<br>No. (%) |         |
| Total No. of patients      | 11665                        | (100.0) | 11629               | (100.0) | 10184                        | (100.0) | 10131               | (100.0) |
| Age, y (SD)                | 54.7                         | (7.1)   | 54.7                | (7.1)   | 54.4                         | (6.8)   | 54.4                | (6.8)   |
| Smoking                    |                              |         |                     |         |                              |         |                     |         |
| Current                    | 1358                         | (11.7)  | 1352                | (11.6)  | 1075                         | (10.6)  | 1052                | (10.4)  |
| Past                       | 4392                         | (37.7)  | 4324                | (37.2)  | 3825                         | (37.6)  | 3788                | (37.4)  |
| Never                      | 5907                         | (50.7)  | 5943                | (51.2)  | 5278                         | (51.9)  | 5283                | (52.2)  |
| Body Mass Index (SD)       | 25.9                         | (5.0)   | 25.9                | (5.0)   | 25.9                         | (4.9)   | 25.9                | (4.9)   |
| Alcohol use, drink/wk      |                              |         |                     |         |                              |         |                     |         |
| < 1                        | 6595                         | (56.6)  | 6571                | (56.5)  | 5656                         | (55.6)  | 5658                | (55.9)  |
| > 1                        | 5067                         | (43.5)  | 5057                | (43.5)  | 4525                         | (44.5)  | 4472                | (44.2)  |
| Physical Activity, kcal/wk |                              |         |                     |         |                              |         |                     |         |
| < 1000                     | 7570                         | (65.7)  | 7426                | (64.5)  | 6599                         | (65.6)  | 6404                | (63.9)  |
| > 1000                     | 3961                         | (34.4)  | 4088                | (35.5)  | 3467                         | (34.4)  | 3623                | (36.1)  |
| Menopausal Status          |                              |         |                     |         |                              |         |                     |         |
| Pre-menopause              | 3212                         | (27.6)  | 3215                | (27.7)  | 2923                         | (28.8)  | 2896                | (28.6)  |
| Peri-menopause             | 2056                         | (17.7)  | 2108                | (18.2)  | 1825                         | (18.0)  | 1856                | (18.4)  |
| Post, HRT now              | 3652                         | (31.4)  | 3675                | (31.7)  | 3194                         | (31.4)  | 3253                | (32.2)  |
| Post, not HRT              | 2715                         | (23.3)  | 2602                | (22.4)  | 2217                         | (21.8)  | 2105                | (20.8)  |
| Family Cancer History      |                              |         |                     |         |                              |         |                     |         |
| No                         | 9569                         | (82.0)  | 9541                | (82.0)  | 8351                         | (82.0)  | 8343                | (82.4)  |
| Yes                        | 2096                         | (18.0)  | 2088                | (18.0)  | 1833                         | (18.0)  | 1788                | (17.7)  |
| Aspirin Assignment         |                              |         |                     |         |                              |         |                     |         |
| Placebo                    | 5863                         | (50.3)  | 5814                | (50.0)  | 5113                         | (50.2)  | 5039                | (49.7)  |
| Active                     | 5802                         | (49.7)  | 5815                | (50.0)  | 5071                         | (49.8)  | 5092                | (50.3)  |

## Beta-carotene Assignment

|         |      |        |      |        |      |        |      |        |
|---------|------|--------|------|--------|------|--------|------|--------|
| Placebo | 5858 | (50.2) | 5834 | (50.2) | 5112 | (50.2) | 5083 | (50.2) |
| Active  | 5807 | (49.8) | 5795 | (49.8) | 5072 | (49.8) | 5048 | (49.8) |

---

**Supplementary Table 2. Baseline characteristics of participants in the ATBC cancer case control set.**

| <b>Characteristic</b>                        | <b>Alpha-tocopherol<br/>(n=2,287)</b> | <b>Placebo<br/>(n=2,344)</b> |
|----------------------------------------------|---------------------------------------|------------------------------|
| Mean Age, y (SD)                             | 58.0 (5.0)                            | 58.0 (5.0)                   |
| Current Smoking, %                           | 100                                   | 100                          |
| Mean Body Mass Index, kg/m <sup>2</sup> (SD) | 26.2 (3.7)                            | 26.2 (3.7)                   |
| Mean Alcohol use, g ethanol/day (SD)         | 16.5 (19.4)                           | 16.4 (19.8)                  |
| Physical Activity (leisure exercise), %      |                                       |                              |
| Unknown                                      | 0.2                                   | 0.3                          |
| < 3 times per week                           | 78.7                                  | 80.9                         |
| ≥ 3 times per week                           | 21.2                                  | 18.9                         |
| Beta-carotene Assignment, %                  |                                       |                              |
| No                                           | 50.1                                  | 50.2                         |
| Yes                                          | 49.9                                  | 49.8                         |
| rs4680                                       |                                       |                              |
| met/met                                      | 674                                   | 690                          |
| val/met                                      | 1144                                  | 1177                         |
| val/val                                      | 469                                   | 477                          |
| rs4818                                       |                                       |                              |
| C/C                                          | 1063                                  | 1099                         |
| C/G                                          | 1001                                  | 1017                         |
| G/G                                          | 223                                   | 228                          |

**Supplementary Figures 1. CONSORT Flow Diagram for the Women’s Health Study (WHS) and Women’s Genome Health Study (WGHS) genetic subset.**

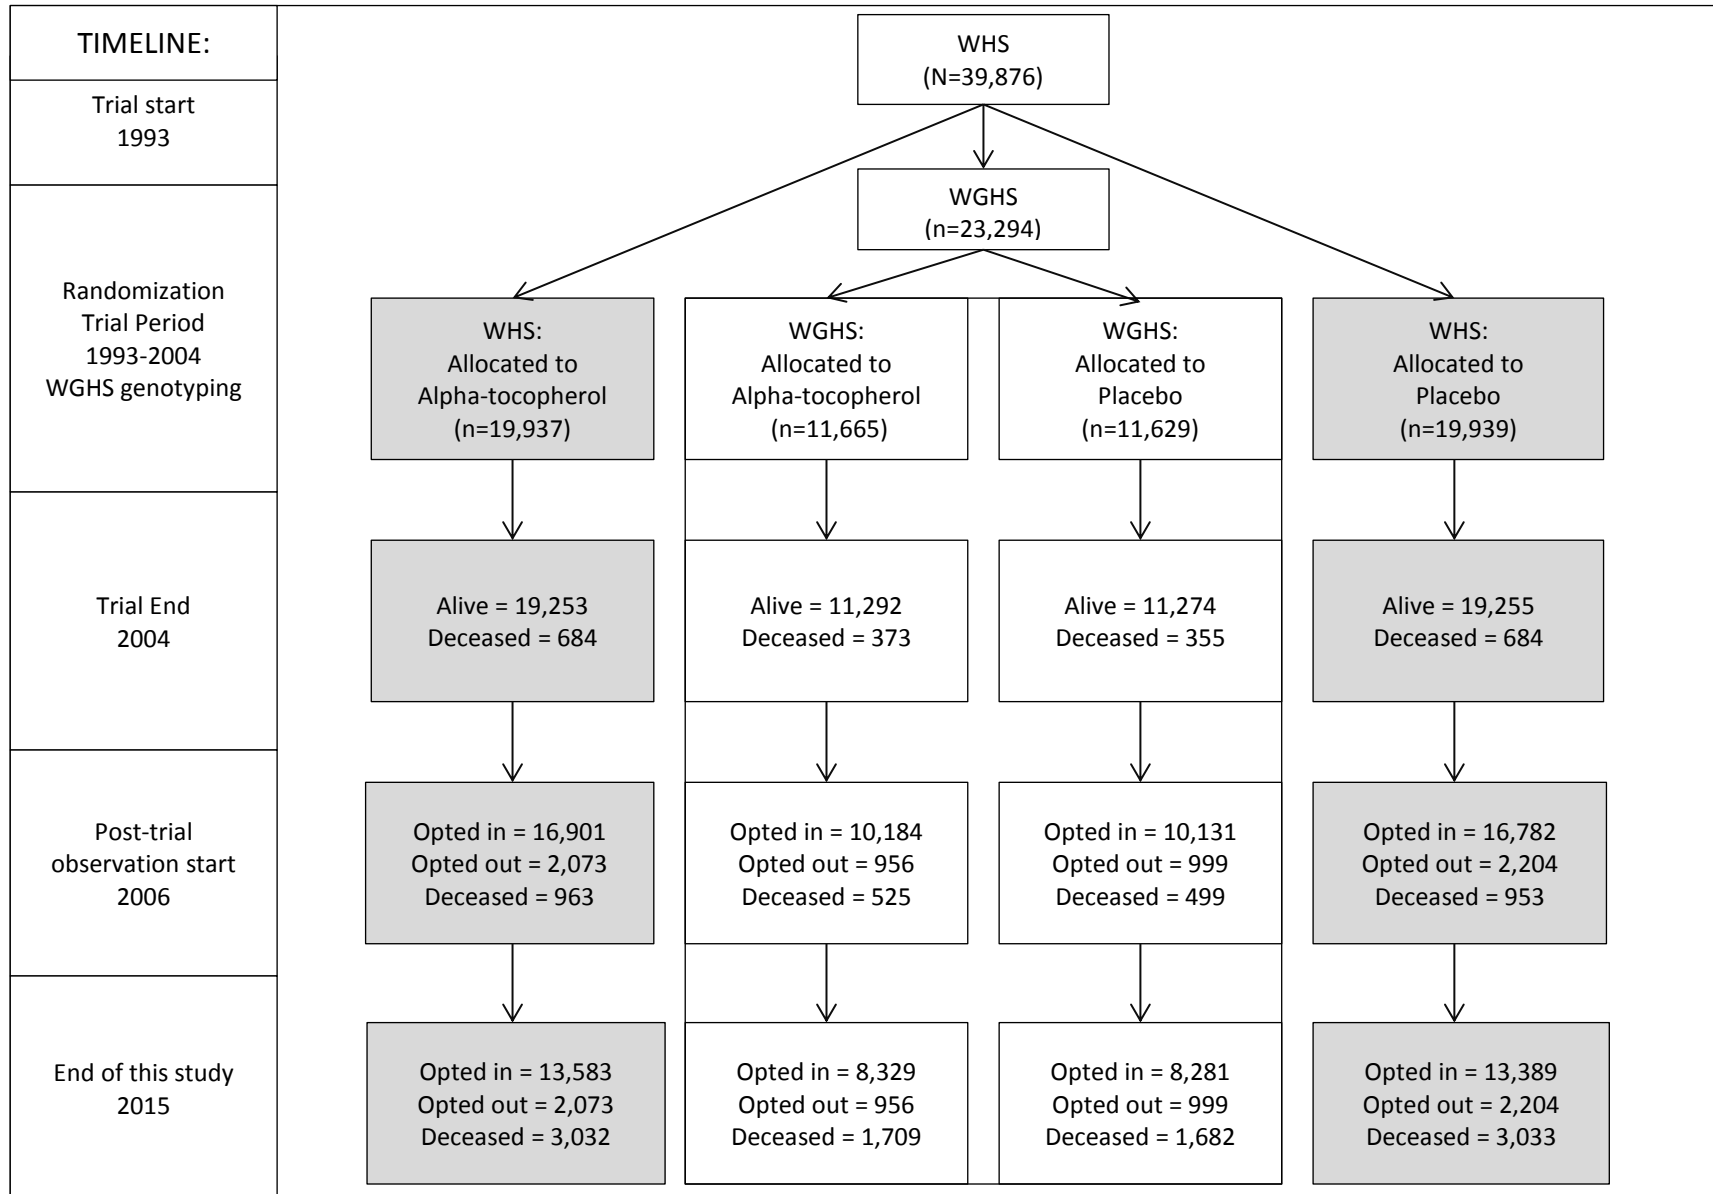

**Supplementary Figure 2. Kaplan-Meier curves comparing cumulative incidence of first cancer which was lymphoma and leukemia by *COMT* genotype. Results are shown for rs4680 (A-C) and rs4818 (D-F) genotype strata among WGHS participants randomized to alpha-tocopherol or placebo in the overall period (trial plus 10-years). Differences between genotype strata were tested using the log-rank test; P-values were two-sided.**

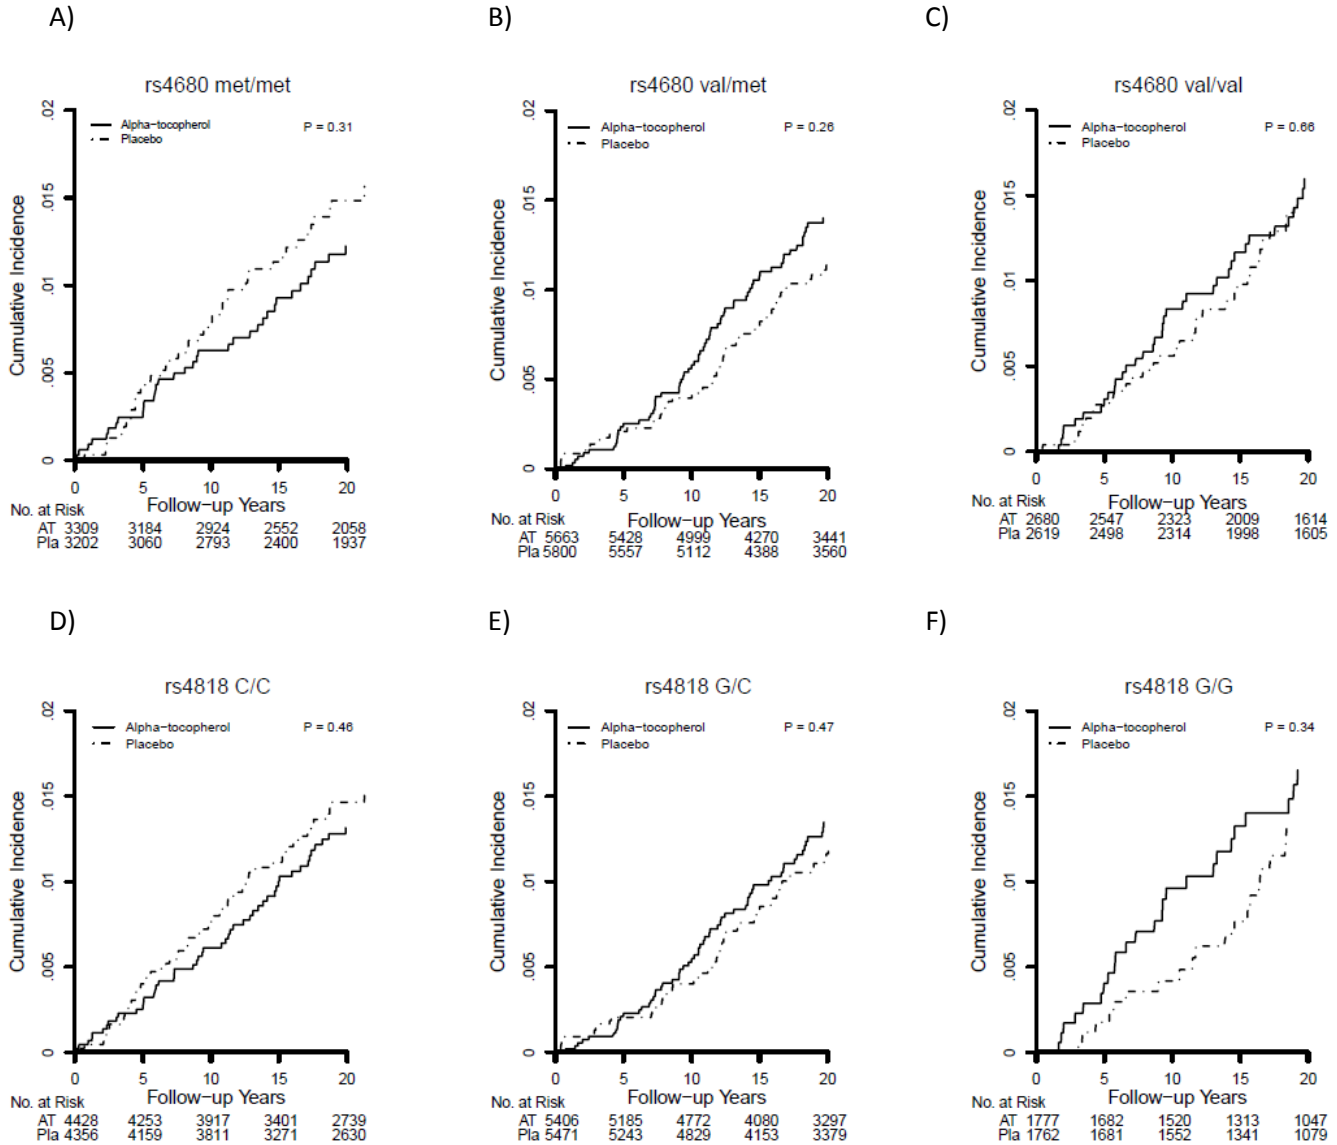

Supplement: supplement_material_djy204.pdf [file supplement_material_djy204.pdf]
